# Supplementary material
Source: PubMed Central journal article supplement (PMC3195057)

Fig. S1

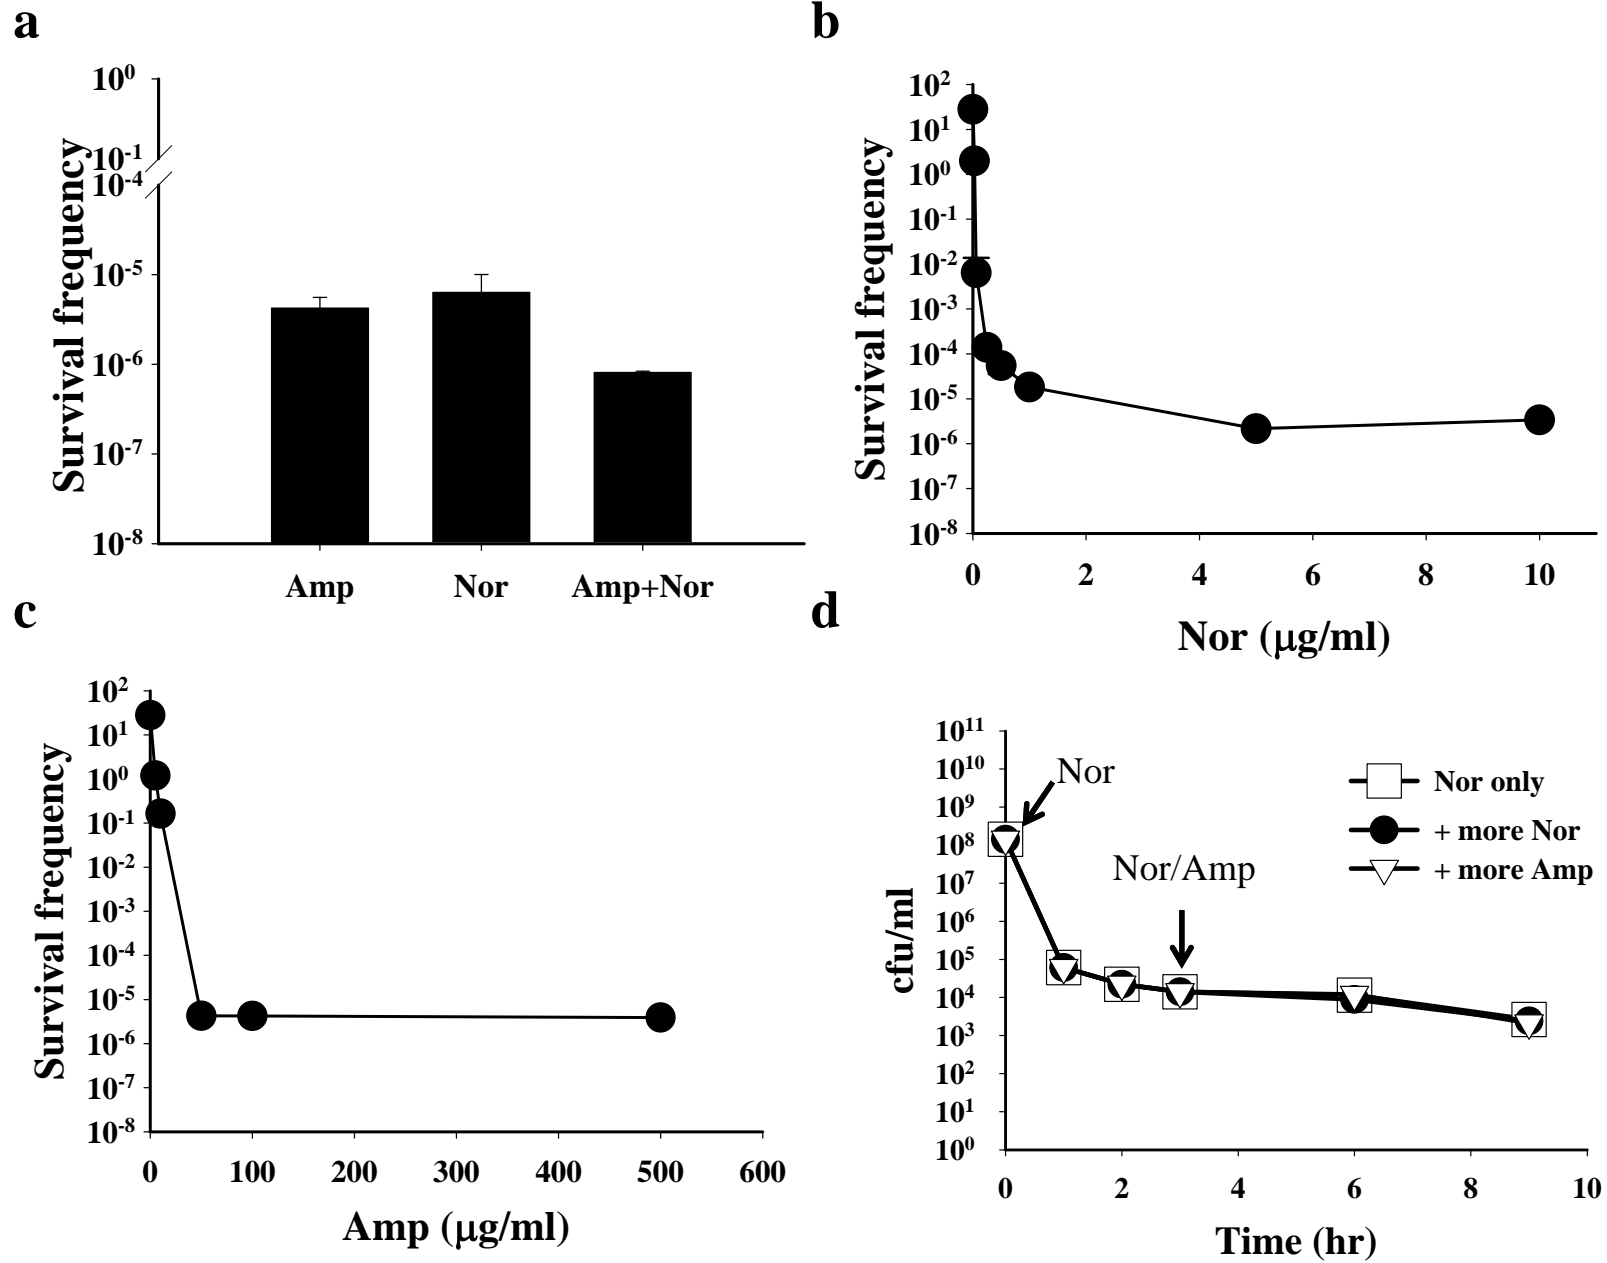

Fig. S2

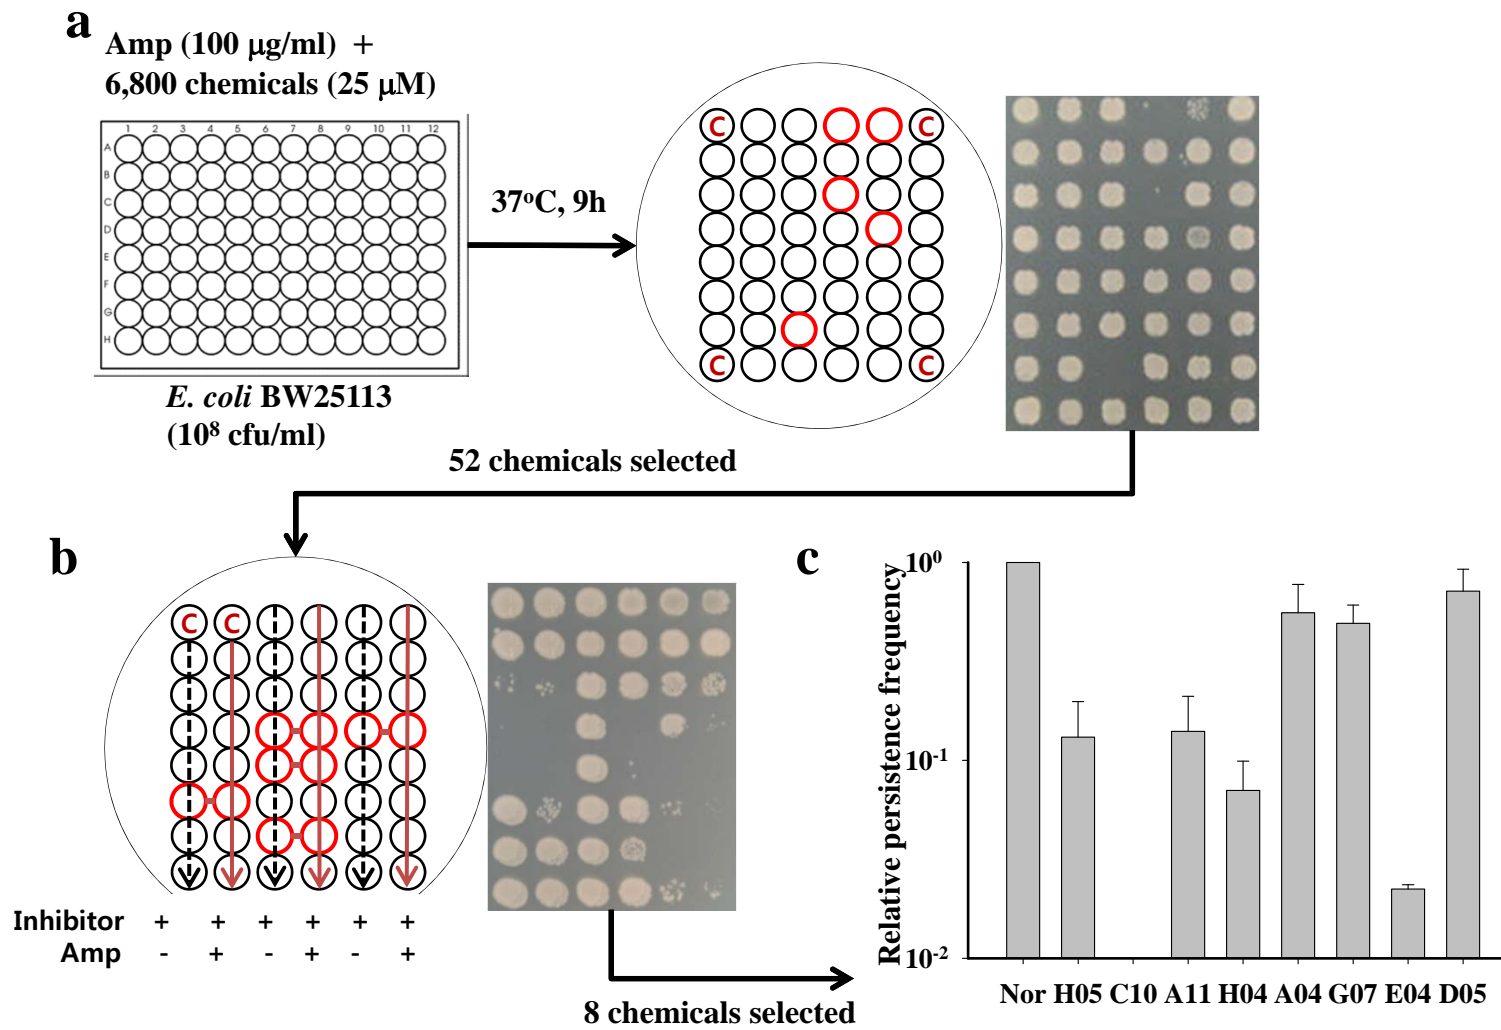

Fig. S3

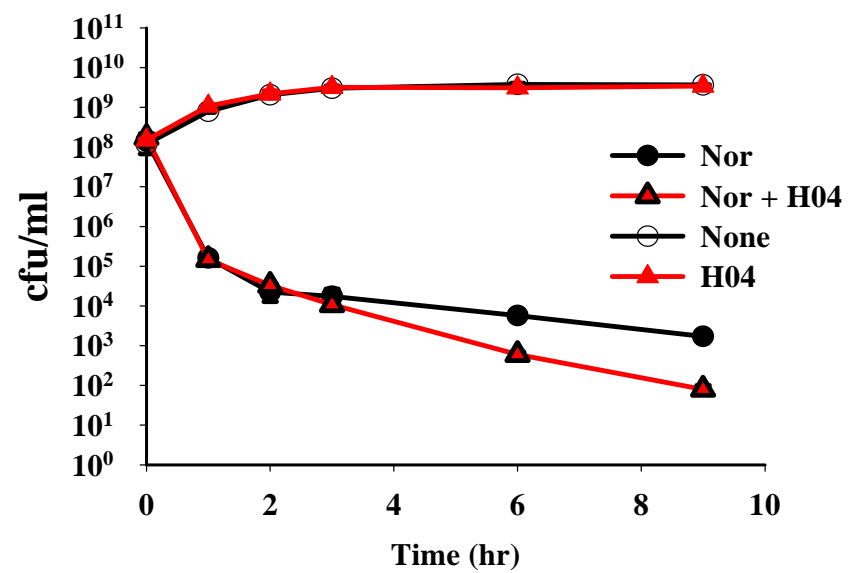

Fig. S4

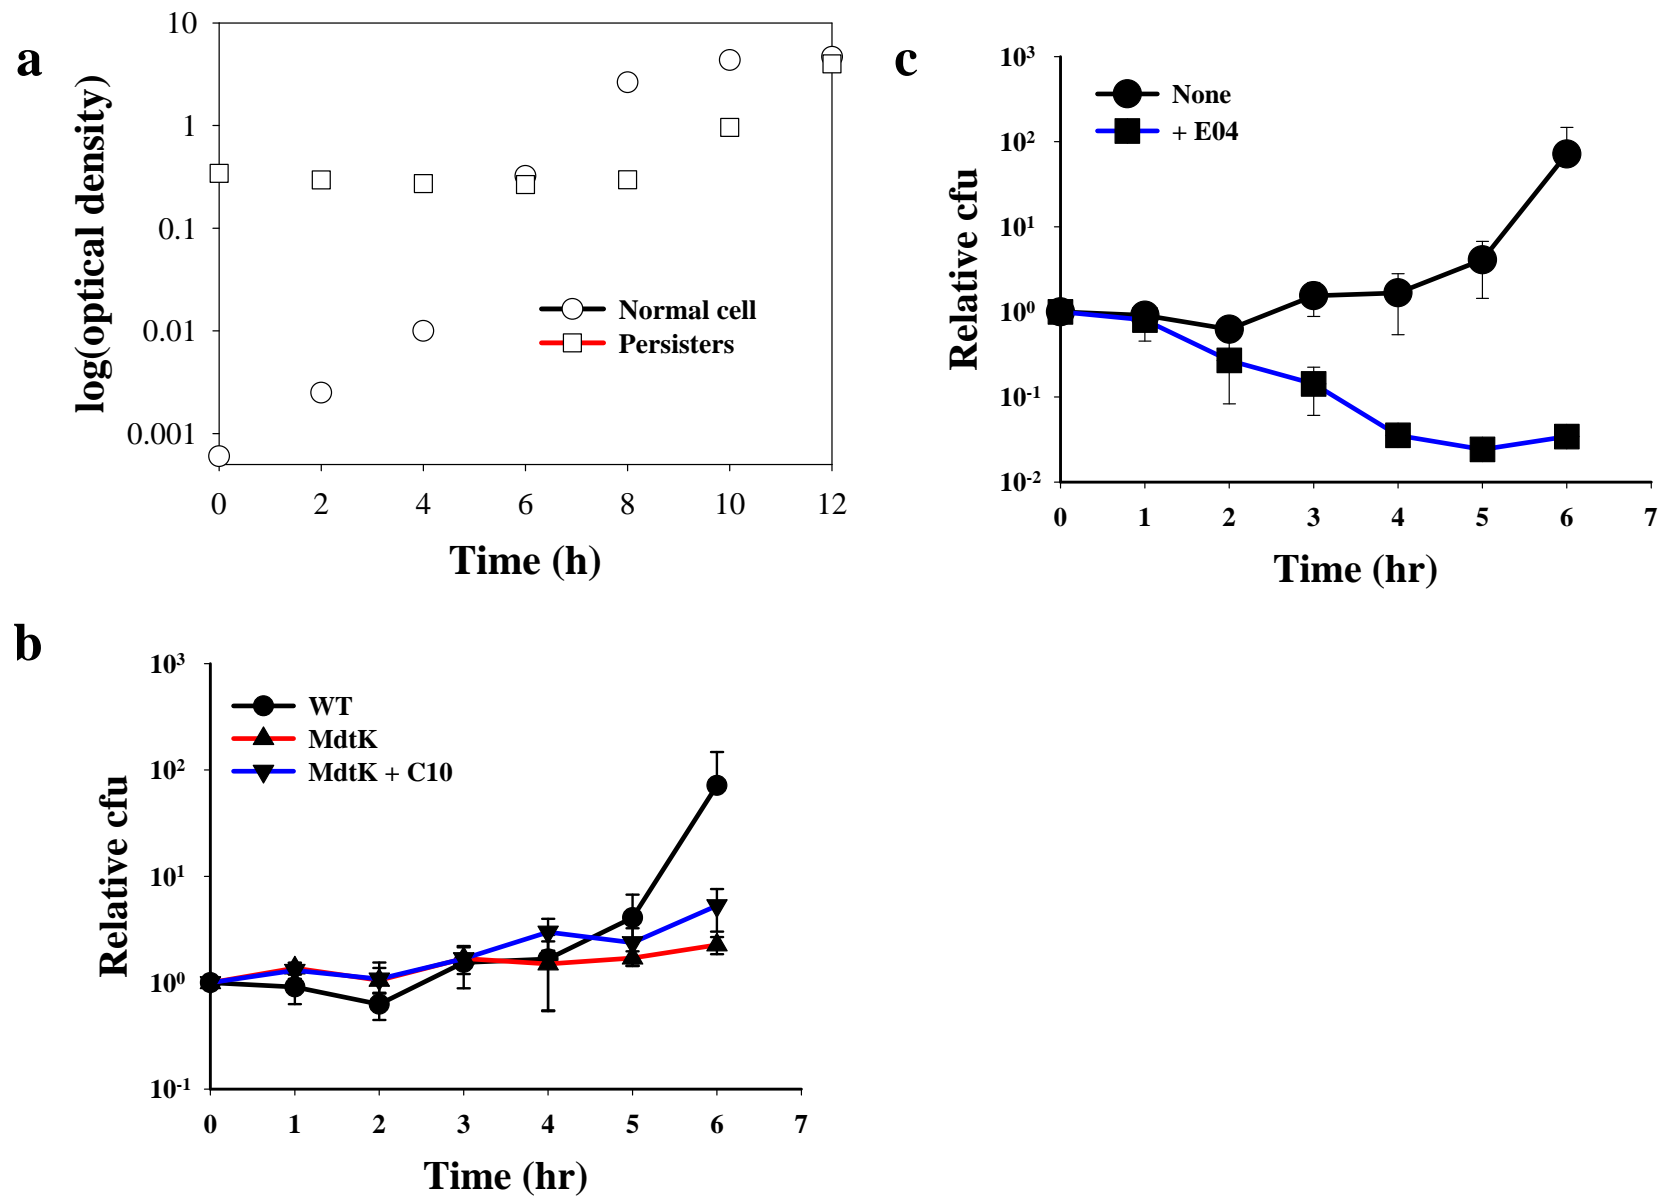

Fig. S5

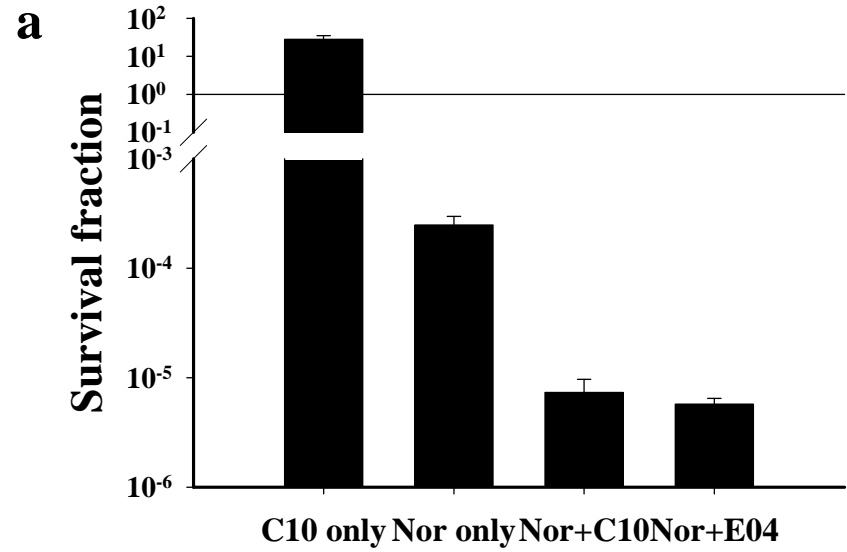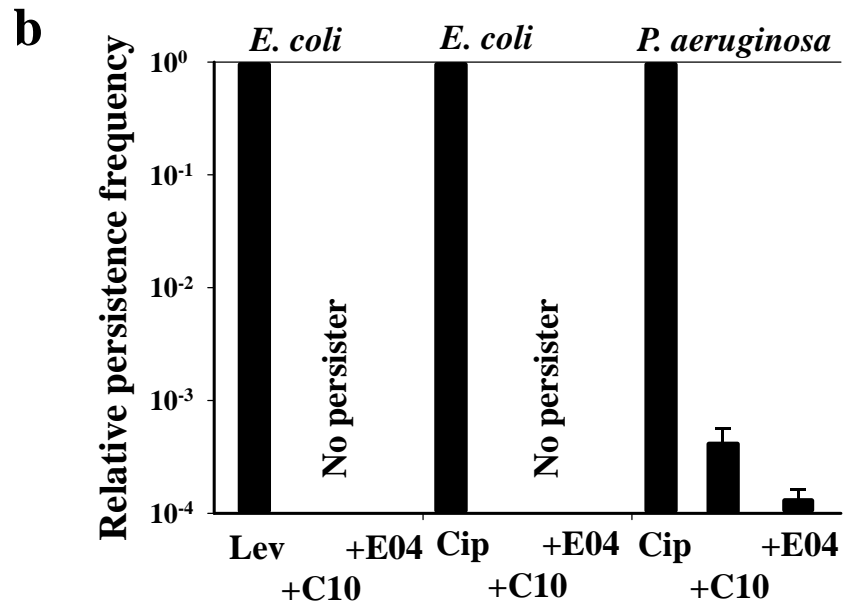

Supplement: supp_55_11_5380__1.pdf [file supp_55_11_5380__1.pdf]
